# Supplementary material for: Neutrophil extracellular traps released by neutrophils impair revascularization and vascular remodeling after stroke
Source: PubMed Central journal article supplement (PMC7237502; doi:10.1038/s41467-020-16191-y), 2020-05-19
Supplement: 41467_2020_16191_MOESM1_ESM.pdf [file 41467_2020_16191_MOESM1_ESM.pdf]

**Neutrophil extracellular traps released by neutrophils impair revascularization and  
vascular remodeling after stroke**

Kang et al.

## Supplementary Figures

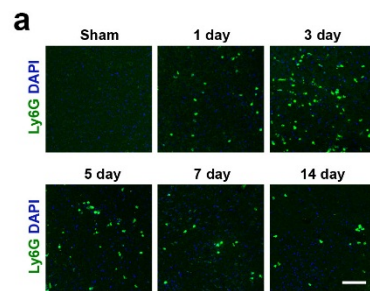

**Supplementary Figure 1.** Neutrophils accumulated inside brain vessels and the parenchyma during all stages of stroke. a Representative images of Ly6G-positive neutrophils in the peri-infarct cortex of mice subjected to stroke, compared to sham-operated mice. Bar = 40  $\mu$ m. Independent experiments are repeated at least three times.

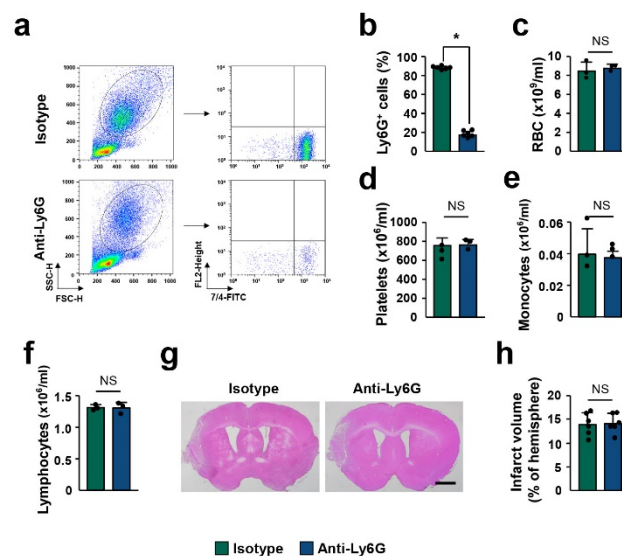

**Supplementary Figure 2.** Effects of neutrophil depletion on the number of blood neutrophils, other blood cells, and infarct volumes. a, b Representative flow cytometry analysis (a) and quantification (b) of neutrophils in peripheral blood at 14 days after stroke. For gating, granulocytes were gated using forward scatter height (FSC-H) versus side scatter height (SSC-H), neutrophil surface marker positive events were gated using a FITC-conjugated rat monoclonal anti-mouse neutrophil antibody (anti-7/4, 1:300, Abcam, cat. no.

ab53453) versus fluorescence height (n = 6), unpaired two-tailed Student's t test was applied with \* P < 0.0001. FL, fluorescence. c-f Red blood cell (RBC), platelet, monocyte and lymphocyte counts in peripheral blood in mice treated with control antibody or anti-Ly6G antibody at 14 days after stroke (n = 3). g Representative H&E stained sections at 14 days after stroke from mice treated with control antibody or anti-Ly6G antibody (n = 6). h Quantification of the infarct volume (n = 6). Statistical analysis was performed using unpaired two-tailed Student's t test. Data are presented as mean ± SD. Source data underlying graph b, c, d, e, f, h are provided as a Source Data file.

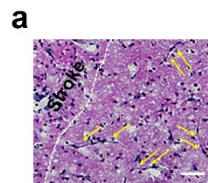

**Supplementary Figure 3.** a, H&E-stained sections showing the presence of extracellular DNA (arrows) in the peri-infarct cortex at 3 days after stroke. Bar = 40 μm. Independent experiments are repeated at least three times.

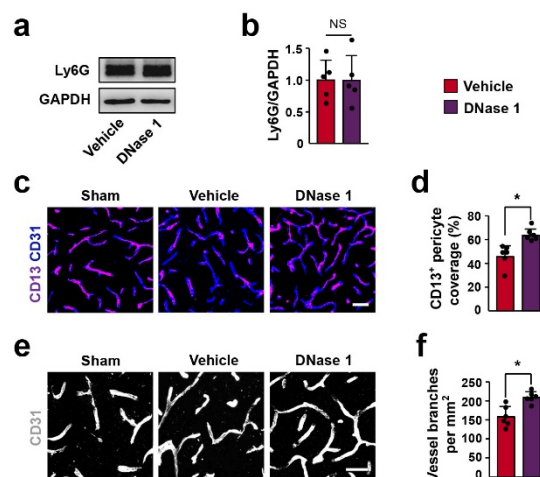

**Supplementary Figure 4.** Treatment with DNase 1 enhanced CD13<sup>+</sup> pericyte coverage and vascular branches, whereas did not affect neutrophil recruitment. a, b Western blot analysis of the amount of neutrophils at 3 days after stroke in mice treated with vehicle or

DNase 1 (n = 5), unpaired two-tailed Student's t test was applied with P = 0.9878. c, d Representative images (c) and quantification (d) of CD13-positive pericyte coverage on CD31-positive brain capillaries at 14 days after stroke in mice treated with vehicle or DNase 1 (n = 6), unpaired two-tailed Student's t test was applied with \* P = 0.0022. Bar = 40  $\mu$ m. e, f Representative images (e) and quantification (f) of vascular branches at 14 days after stroke in mice treated with vehicle or DNase 1 (n = 6), unpaired two-tailed Student's t test was applied with \* P = 0.0024. Bar = 40  $\mu$ m. Data are presented as mean  $\pm$  SD. Source data underlying graph a, b, d, f are provided as a Source Data file.

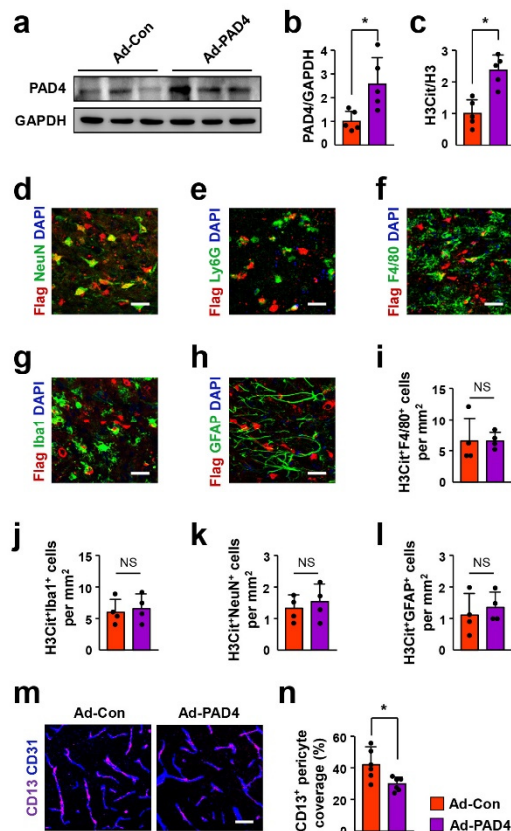

**Supplementary Figure 5.** The efficiency of PAD4 expression and cellular distribution after injection of recombinant PAD4 adenovirus. a, b Western blot confirmed that injection of PAD4 adenovirus successfully induced upregulation of PAD4 protein expression in the ischemic cortex at 3 days (n = 5 biologically independent experiments), unpaired two-tailed Student's t test was applied with \* P = 0.0186. c Quantification of

H3Cit levels in the ischemic cortex at 3 days in mice treated with control or PAD4 adenovirus (n = 5), unpaired two-tailed Student's t test was applied with \* P = 0.0015. d-h PAD4-flag was present in neurons, neutrophils, macrophages/microglial cells and microglial cells at 3 days after stroke, but was rarely detected in astrocytes. Bar = 20  $\mu$ m. Independent experiments are repeated at least three times. i-l PAD4 adenoviruses treatment did not affect the number of H3Cit<sup>+</sup> macrophages/microglial cells, H3Cit<sup>+</sup> microglial cells, H3Cit<sup>+</sup> neurons, and H3Cit<sup>+</sup> astrocytes at 3 days after stroke (n = 4), unpaired two-tailed Student's t test was applied with P = 0.9915 (i), P = 0.7386 (j), P = 0.5838 (k), P = 0.5771(l). m, n Representative images (m) and quantitative analysis (n) of CD13-positive pericyte coverage on CD31-positive brain capillaries at 14 days after stroke in mice treated with control or PAD4 adenovirus (n = 6), unpaired two-tailed Student's t test was applied with \* P = 0.0172. Bar = 40  $\mu$ m. Data are presented as mean  $\pm$  SD. Source data underlying graph a, b, c, i, j, k, l, n are provided as a Source Data file.

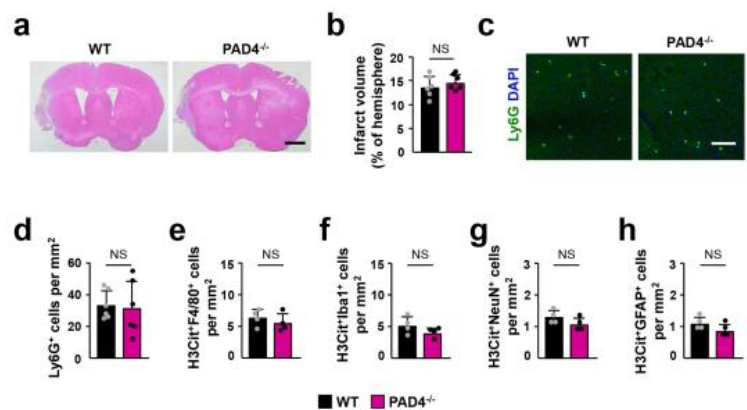

**Supplementary Figure 6.** Effects of PAD4 deficiency on infarct volumes, the number of neutrophils, H3Cit<sup>+</sup> macrophages/microglial cells, H3Cit<sup>+</sup> microglial cells, H3Cit<sup>+</sup> neurons, and H3Cit<sup>+</sup> astrocytes. a Representative H&E stained sections at 14 days after stroke from WT and PAD4<sup>-/-</sup> mice (n = 6). b Quantification of the infarct volume (n = 6). c, d Representative images (c) and quantification (d) of Ly6G-positive neutrophils in the peri-infarct cortex at 14 days in WT and PAD4<sup>-/-</sup> mice (n = 6). Bar = 40  $\mu$ m. e-h

Quantification of the number of H3Cit<sup>+</sup> macrophages/microglial cells (e), H3Cit<sup>+</sup> microglial cells (f), H3Cit<sup>+</sup> neurons (g), and H3Cit<sup>+</sup> astrocytes (h) at 3 days after stroke in WT and PAD4<sup>-/-</sup> mice (n = 4). Statistical analysis was performed using unpaired two-tailed Student's t test. Data are presented as mean ± SD. Source data underlying graph b, d, e, f, g, h are provided as a Source Data file.

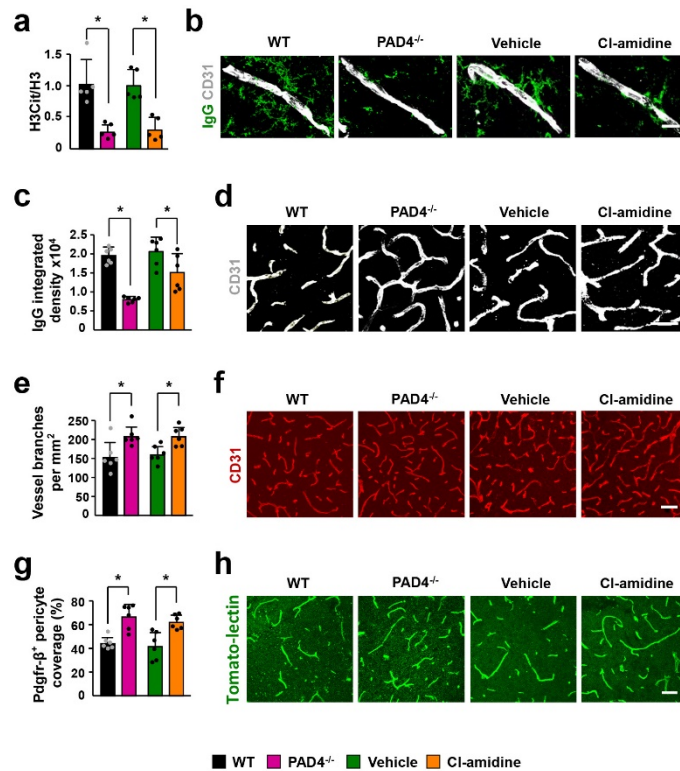

**Supplementary Figure 7.** PAD4 deficiency or inhibition by Cl-amidine reduced NETs and BBB breakdown, and promotes neovascularization. a Quantification of H3Cit levels in the peri-infarct cortex at 3 days in WT and PAD4<sup>-/-</sup> mice, and WT mice treated with vehicle or the PAD inhibitor Cl-amidine (n = 5), Mann-Whitney test was applied with \* P = 0.0079 (WT vs PAD4<sup>-/-</sup>), \* P = 0.0079 (Vehicle vs Cl-amidine). Data show results from three technical replicates. b, c Representative images of IgG deposits (b) and quantification of extravascular IgG deposits (c) at 14 days after stroke (n = 6), Mann-Whitney test was applied with \* P = 0.0022 (WT vs PAD4<sup>-/-</sup>), unpaired two-tailed Student's t test was applied with \* P = 0.0463 (Vehicle vs Cl-amidine). Bar = 20 μm. d, e

Representative images (d) and quantification (e) of vascular branches at 14 days after stroke (n = 6), unpaired two-tailed Student's t test was applied with \* P = 0.0210 (WT vs PAD4<sup>-/-</sup>), \* P = 0.0068 (Vehicle vs Cl-amidine). Bar = 40 μm. f Representative images of CD31-positive microvessels in the peri-infarct cortex at 14 days for each group. g Quantification of pericyte coverage in the peri-infarct cortex (n = 6), unpaired two-tailed Student's t test was applied with \* P = 0.0009 (WT vs PAD4<sup>-/-</sup>), \* P = 0.0040 (Vehicle vs Cl-amidine). h Representative images of tomato-lectin perfused vessels in the peri-infarct cortex at 14 days. Bar = 40 μm. Data are presented as mean ± SD. Source data underlying graph a, c, e, g are provided as a Source Data file.

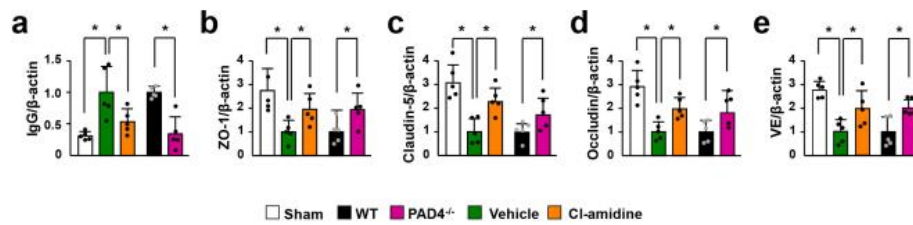

**Supplementary Figure 8.** PAD4 deficiency or inhibition by Cl-amidine reduced BBB breakdown and preserved BBB integrity. a-e Immunoblot quantification of IgG levels in capillary-depletion brain tissue (a), the tight junction protein ZO-1 (b), claudin-5 (c), occludin (d) and the adherens junction protein VE-cadherin (e) in isolated brain microvessels at 14 days after stroke (n = 5). One-way ANOVA test was applied with \* P = 0.0032 (Sham vs Vehicle from a), \* P = 0.0376 (Vehicle vs Cl-amidine from a), \* P = 0.0056 (Sham vs Vehicle from b), \* P = 0.0323 (Vehicle vs Cl-amidine from b), \* P = 0.0006 (Sham vs Vehicle from c), \* P = 0.0185 (Vehicle vs Cl-amidine from c), \* P = 0.0003 (Sham vs Vehicle from d), \* P = 0.0317 (Vehicle vs Cl-amidine from d), \* P = 0.0003 (Sham vs Vehicle from e), \* P = 0.0373 (Vehicle vs Cl-amidine from e), unpaired two-tailed Student's t test was applied with \* P = 0.0008 (WT vs PAD4<sup>-/-</sup> from a), \* P = 0.0393 (WT vs PAD4<sup>-/-</sup> from b), \* P = 0.0242 (WT vs PAD4<sup>-/-</sup> from c), \* P = 0.0322

(WT vs PAD4<sup>-/-</sup> from d), Mann-Whitney test was applied with \* P = 0.0153 (WT vs PAD4<sup>-/-</sup> from e). Data are presented as mean ± SD. Source data underlying graph a, b, c, d, e are provided as a Source Data file

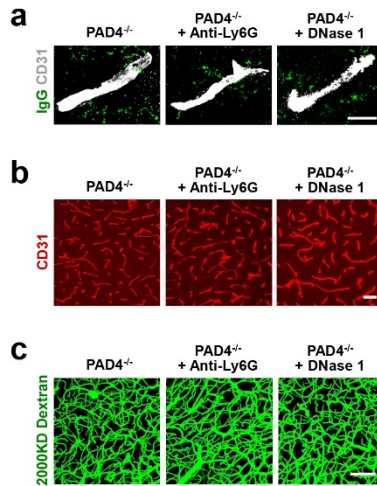

**Supplementary Figure 9.** a-c Representative images of IgG extravascular deposits (a), CD31-positive microvessels (b) and perfused cortical capillaries with intravenously injected FITC-dextran (c) in the peri-infarct cortex at 14 days in PAD4<sup>-/-</sup> mice treated with either vehicle, anti-Ly6G antibody or DNase 1. Bar = 10µm (a), 40µm (b) and 100 µm (c). Independent experiments are repeated at least three times.

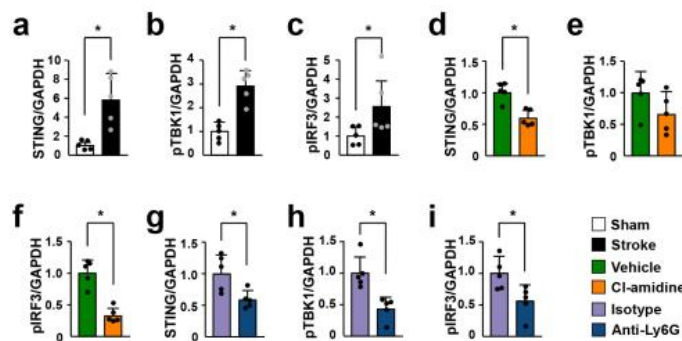

**Supplementary Figure 10.** Neutrophil depletion and the PAD inhibitor CI-amidine reduced stroke-induced upregulation of STING and activation of TBK1 and IRF3. a-c Quantification of STING (a), phosphorylated TBK1 (p-TBK1) (b) and p-IRF3 (c) in the



cortex of mice without stroke or at day 3 after stroke (n = 5), Mann-Whitney test was applied with \* P = 0.0079 (a), \* P = 0.0278 (c), unpaired two-tailed Student's t test was applied with \* P = 0.0014 (b). d-i Treatment of mice with Cl-amidine (d-f) or anti-Ly6G antibody (g-i) decreased the levels of STING (d, g), p-TBK1 (e, h) and p-IRF3 (f, i) in the cortex at day 3 after stroke (n=5), unpaired two-tailed Student's t test was applied with \* P = 0.0014 (d), \* P = 0.0002 (f), \* P = 0.0108 (g), \* P = 0.0040 (h) , \* P = 0.0215 (i), and Mann-Whitney test was applied with P = 0.0952 (e). Data are presented as mean ± SD. Source data underlying graph a, b, c, d, e, f, g, h, i are provided as a Source Data file.

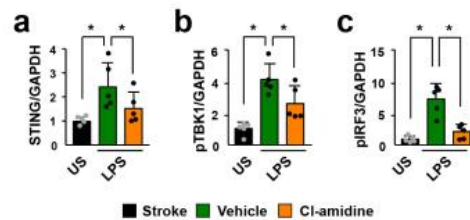

**Supplementary Figure 11.** a-c The PAD inhibitor Cl-amidine reduced LPS-induced upregulation of STING and activation of TBK1 and IRF3 in isolated neutrophils from mice at 3 days after stroke (n = 5). One-way ANOVA test was applied with \* P = 0.0118 (Stroke vs Vehicle from a), \* P = 0.0003 (Stroke vs Vehicle from b), \* P = 0.0451 (Vehicle VS Cl-amidine from b), \* P < 0.0001 (Stroke vs Vehicle from c), \* P = 0.0004 (Vehicle VS Cl-amidine from c). Data are presented as mean ± SD. Source data underlying graph a, b, c are provided as a Source Data file.
